# Supplementary material
Source: PubMed Central journal article supplement (PMC2793289)

## Binding the atypical RA domain of Ste50p to the unfolded Opy2p cytoplasmic tail is essential for HOG pathway

Irena Ekiel<sup>\*#</sup>, Traian Sulea<sup>\*</sup>, Gregor Jansen<sup>†</sup>, Maria Kowalik<sup>\*</sup>, Ovidiu Minailiuc<sup>\*#</sup>, Jing Cheng<sup>\*#</sup>, Doreen Harcus<sup>\*</sup>, Mirosław Cygler<sup>\*</sup>, Malcolm Whiteway<sup>\*‡</sup> and Cunle Wu<sup>\*§¶</sup>

### Supplementary data

Figure S1. Sequence alignment of the RA-like domains of various fungal Ste50p orthologs.

Conserved residues are highlighted in red.

Figure S2. **A)** Prediction of an intrinsically unstructured region in the cytoplasmic tail of Opy2p using metaPrDOS server<sup>1</sup>. **B)** HSQC spectrum of a recombinant <sup>15</sup>N-enriched fragment of Opy2p encompassing amino acid residues 194-333. Expanded region in the insert indicates high resolution of signals typical for mobile unstructured protein regions. **C)** Sequence alignment showing the conservation of the f-peptide among fungal Opy2 homologs.

Figure S3. **A)** The changes in the HSQC spectra of <sup>15</sup>N-labeled Ste50p-RA domain (black) in the presence of the synthetic s<sup>Opy2p</sup> peptide (red).

Figure S4. Mutagenesis analysis of Ste50p-RA domain interaction surface with Opy2p. **A)** Yeast cells (*ste50Δ opy2Δ ssk1Δ*) transformed with *STE50* plasmids with indicated mutations in combination with indicated *OPY2* alleles were assayed for their ability to grow on hyperosmolarity media by serial dilutions. The mutations of Ste50p were indicated on the left, and the Opy2p mutants indicated on the top. The growth media selecting for both the *STE50* and *OPY2* plasmids was –ura –his (left panel of each combination);

and hyperosmotic media was 1.25 M sorbitol (right panel of each combination). **B)** Yeast cells (*ste50Δ FUS1-LacZ*) transformed with *STE50* plasmids with indicated mutations were assayed for their ability to respond to pheromone-induced cell cycle arrest by halo assay (left panel), and pheromone-induced transcriptional activation of a *FUS1-LacZ* reporter (right panel). **C)** Ste50p mutant specifically defective in HOG pathway signaling. Yeast cells (*ste50Δ ssk1Δ*) transformed with *STE50* plasmids with indicated mutations were assayed for their ability to grow on hyperosmolarity media by serial dilutions (left panels), and assayed for their ability to respond to pheromone-induced cell cycle arrest by halo assay (right panel).

Table S1. NMR and refinement statistics for the RA domain<sup>a,b</sup>

---

|                                          |                |
|------------------------------------------|----------------|
| NMR distance and dihedral constraints    |                |
| Distance constraints                     |                |
| Total NOE                                | 1094           |
| Intra-residue                            | 264            |
| Sequential ( $ i-j  = 1$ )               | 312            |
| Medium-range ( $ i-j  \leq 4$ )          | 208            |
| Long range ( $ i-j  \geq 5$ )            | 310            |
| Total dihedral angle restraints          |                |
| $\phi$                                   | 48             |
| $\psi$                                   | 48             |
| Hydrogen bonds                           | 33             |
| Deviations from idealized geometry       |                |
| Bond lengths (Å)                         | 0.0130±0.00014 |
| Bond angles (deg)                        | 2.83±0.03      |
| Average pairwise r.m.s. deviation (Å)    |                |
| Heavy atoms                              | 1.15±0.15      |
| Backbone                                 | 0.57±0.18      |
| Ramachandran statistics <sup>c</sup> (%) |                |
| Residues in most favorable regions       | 83.5           |
| Residues in additionally allowed regions | 15.6           |
| Residues in generously allowed regions   | 0.9            |
| Residues in disallowed regions           | 0.0            |

---

<sup>a</sup> Protein residues 26-93; <sup>b</sup> Twenty final structures were used in r.m.s. deviation calculations; <sup>c</sup> PROCHECK nomenclature

Table S2. Yeast strains used in this study

| Strain  | Relevant genotype                                                                                | Source          |
|---------|--------------------------------------------------------------------------------------------------|-----------------|
| BY4741  | <i>MATa ura3 his3 leu2 trp1 met15</i>                                                            | ATCC            |
| BY4742  | <i>MATα ura3 his3 leu2 trp1 lys2</i>                                                             | ATCC            |
| YCW365  | <i>MATa ura3 leu2 his3 ssk2Δ::LEU2 ssk22Δ::LEU2 ste50Δ::TRP1</i>                                 | Wu et al, 1999  |
| YCW393  | <i>MATa ura3 leu2 his3 trp1 ste50Δ::TRP1 sst1::hisG Fus1::LacZ::LEU2</i>                         | Wu et al., 1999 |
| YCW888  | <i>MATa ssk1Δ::Kan<sup>R</sup> ura3 his3 leu2 met15</i>                                          | ATCC            |
| YCW1299 | <i>MATa ste50Δ::Kan<sup>R</sup> ura3 his3 leu2 met15</i>                                         | ATCC            |
| YCW1301 | <i>MATα ssk1Δ::Kan<sup>R</sup> ura3 his3 leu2 lys2</i>                                           | ATCC            |
| YCW1313 | <i>MATa ste50Δ::Kan<sup>R</sup> ssk1Δ::Kan<sup>R</sup> ura3 his3 leu2</i>                        | This study      |
| YCW1323 | <i>MATα ssk1Δ::Nat<sup>R</sup> ura3 his3 leu2 lys2</i>                                           | Wu et al., 2006 |
| YCW1363 | <i>MATa ssk1Δ::Nat<sup>R</sup> ura3 his3 leu2 lys2 met15</i>                                     | Wu et al., 2006 |
| YCW1377 | <i>MATa opy2Δ::Kan<sup>R</sup> ura3 his3 leu2 met15</i>                                          | ATCC            |
| YCW1380 | <i>MATa opy2Δ::Kan<sup>R</sup> ssk1Δ::Nat<sup>R</sup> ura3 his3 leu2</i>                         | Wu et al., 2006 |
| YCW1381 | <i>MATα opy2Δ::Kan<sup>R</sup> ssk1Δ::Nat<sup>R</sup> ura3 his3 leu2</i>                         | This study      |
| YCW1642 | <i>MATa opy2Δ::Kan<sup>R</sup> ste50Δ::Kan<sup>R</sup> ssk1Δ::Nat<sup>R</sup> ura3 his3 leu2</i> | This Study      |
| YCW1643 | <i>MATα opy2Δ::Kan<sup>R</sup> ste50Δ::Kan<sup>R</sup> ssk1Δ::Nat<sup>R</sup> ura3 his3 leu2</i> | This Study      |
| DC17    | <i>MATα his1</i>                                                                                 | J. Hicks        |
| DC16    | <i>MATa his1</i>                                                                                 | J. Hicks        |

## Referrence:

1. Ishida, T. & Kinoshita, K. Prediction of disordered regions in proteins based on the meta approach. *Bioinformatics* **24**, 1344-8 (2008).

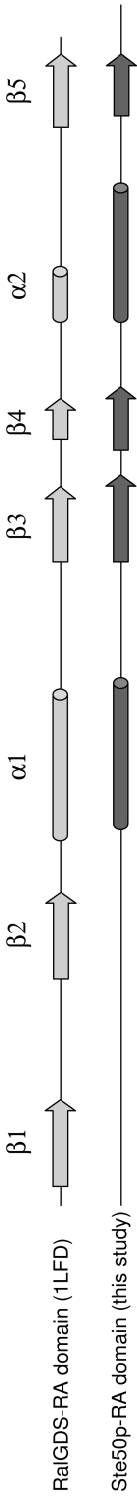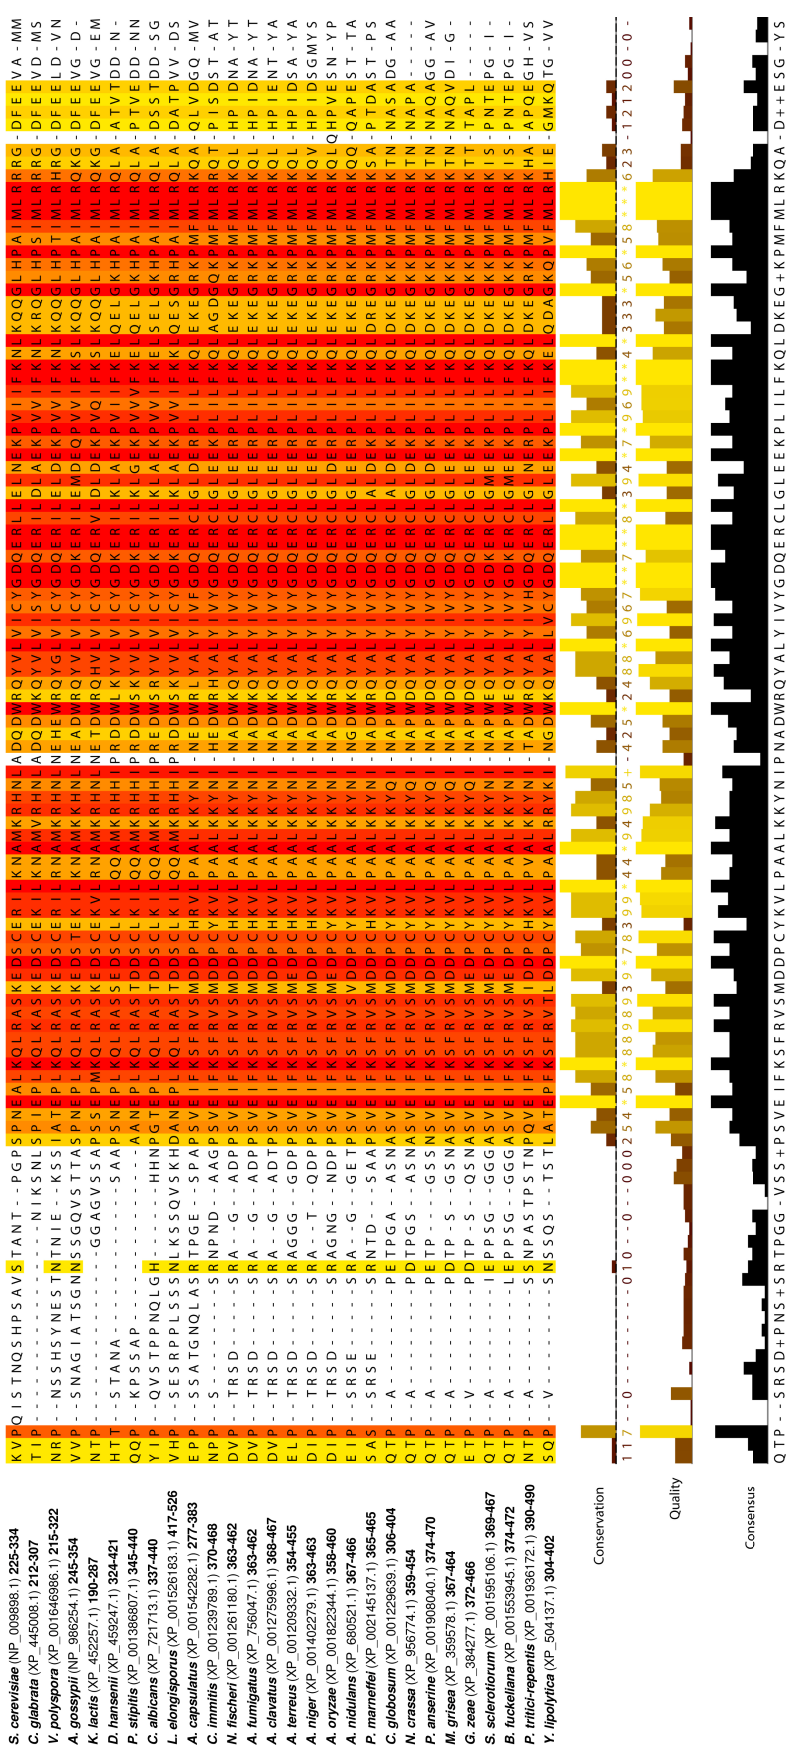



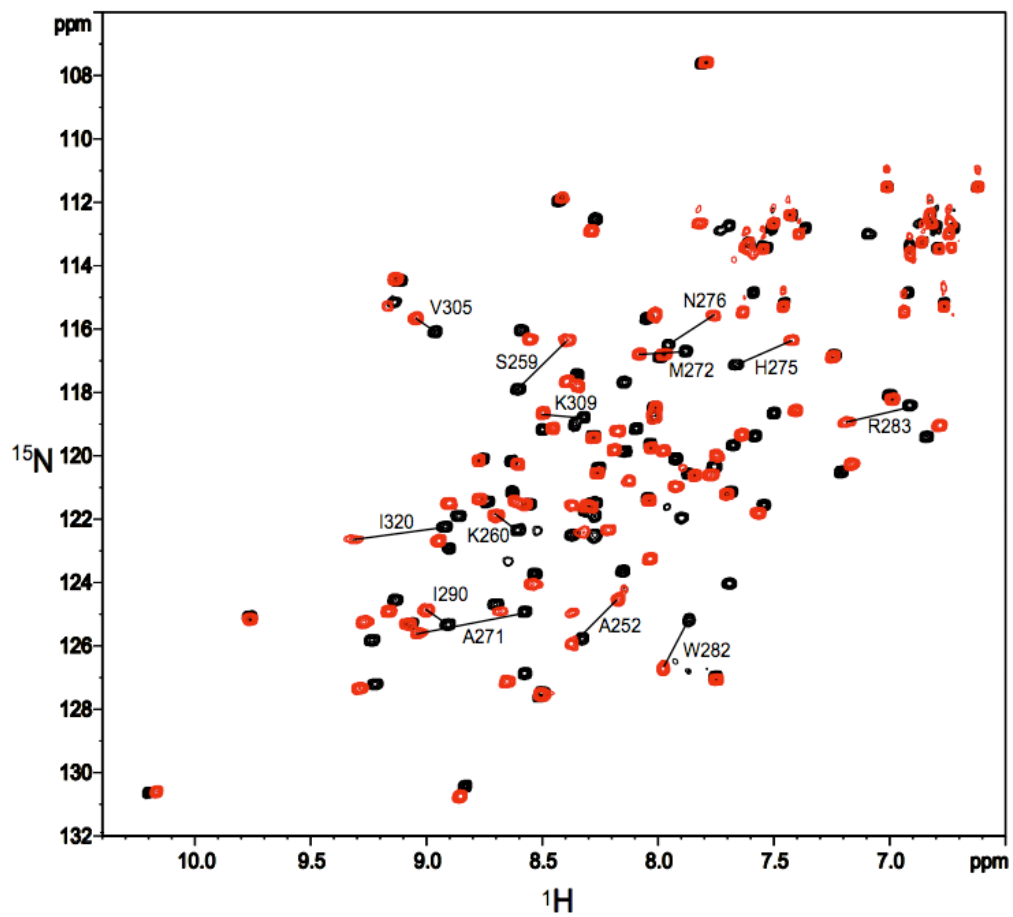



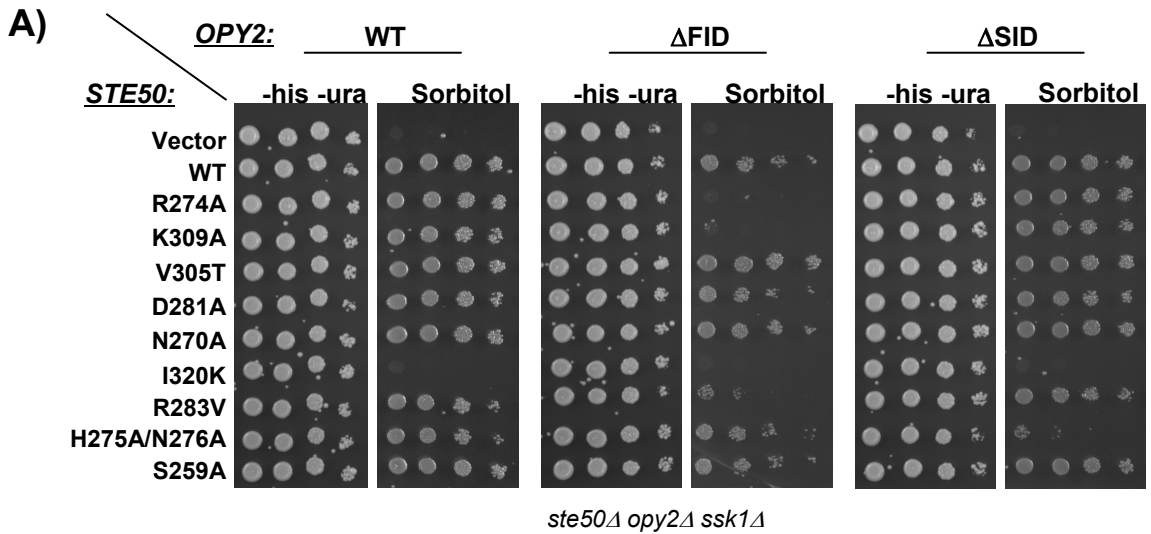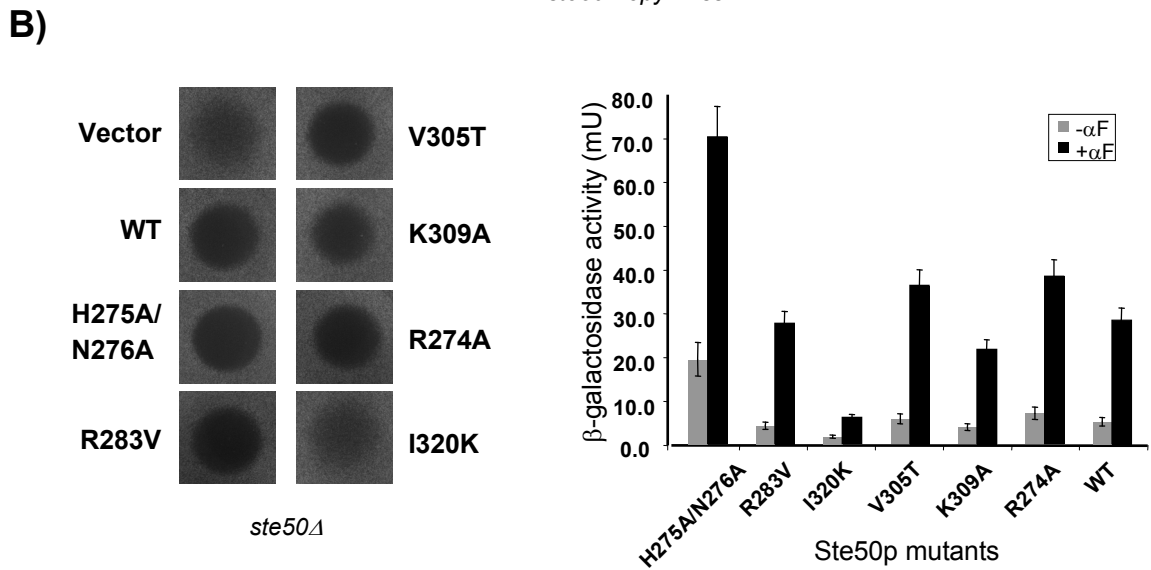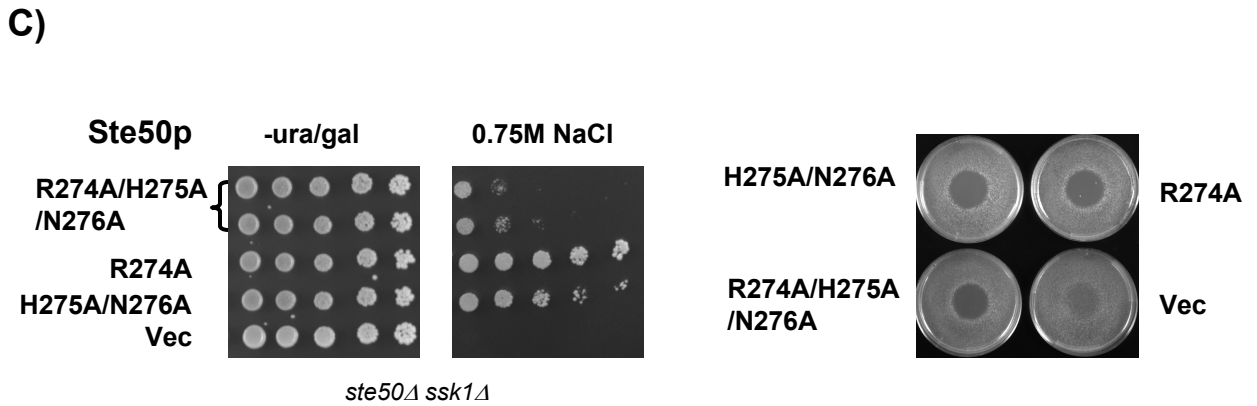

Supplement: E09-07-0645_1.pdf [file E09-07-0645_1.pdf]
